# Supplementary material for: IFNβ Is a Potent Adjuvant for Cancer Vaccination Strategies
Source: PubMed Central journal article supplement (PMC8450325; doi:10.3389/fimmu.2021.735133), 2021-09-06
Supplement: DataSheet_1.pdf [file DataSheet_1.pdf]

## Supplementary Material

### 1 Supplementary Figures

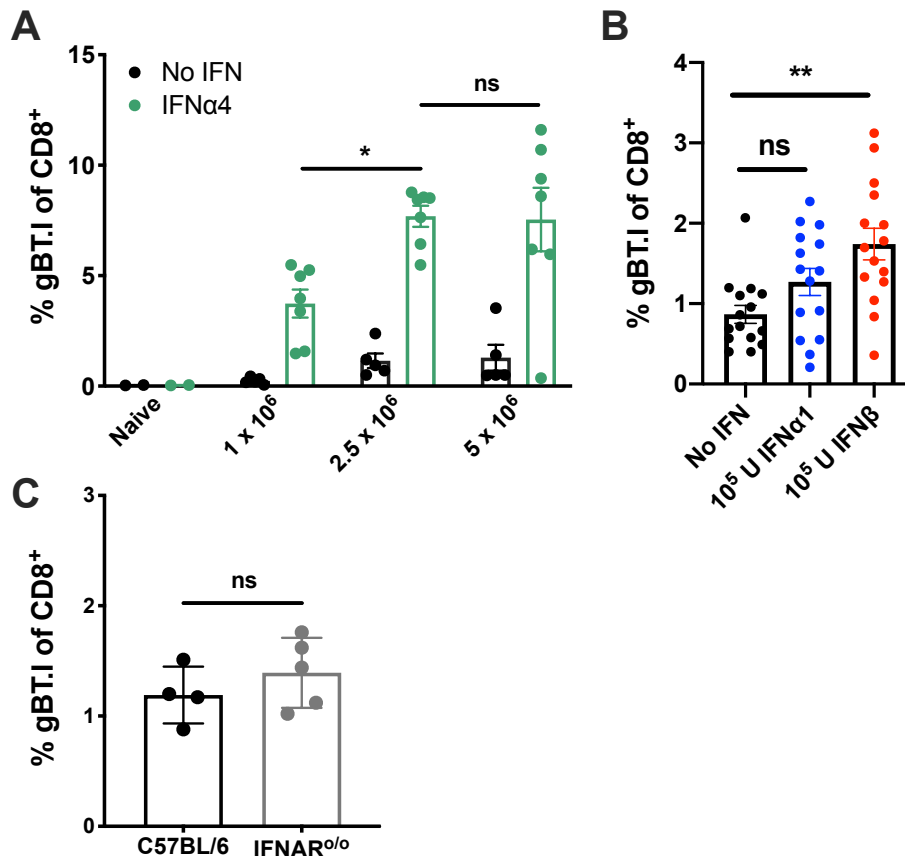

**Supplementary Figure 1. Optimisation and validation of vaccination strategy.** **A,B** C57BL/6 mice received  $5 \times 10^4$  naïve gBT.I cells one day prior to vaccination with irradiated B16.Kb<sup>loss</sup>.gB $\pm$ IFN cells. Mice received titrated amounts of B16.Kb<sup>loss</sup>.gB or B16.Kb<sup>loss</sup>.gB\_IFN $\alpha$ 4 (n = 2-7 per group, from 1-2 independent repeats) (**A**) or  $2.5 \times 10^6$  B16.Kb<sup>loss</sup>.gB cells with or without  $10^5$  U recombinant IFN $\alpha$ 1 or IFN $\beta$  (n = 15 per group from 4 independent repeats) (**B**). Seven days post-vaccination, spleens were harvested and expansion of gBT.I cells was measured. **C**  $2.5 \times 10^6$  naïve gBT.I cells were passively transferred into C57BL/6 and IFNAR<sup>0/0</sup> mice (n = 4-5 per group). Splenocytes were analysed thirty days post-transfer for the presence of gBT.I cells. Data is analysed by two-way ANOVA (**A**), one-way ANOVA (**B**) or unpaired t-test (**C**), \*\*p < 0.01, ns = not significant (p > 0.05). Bars represent mean  $\pm$  SEM.

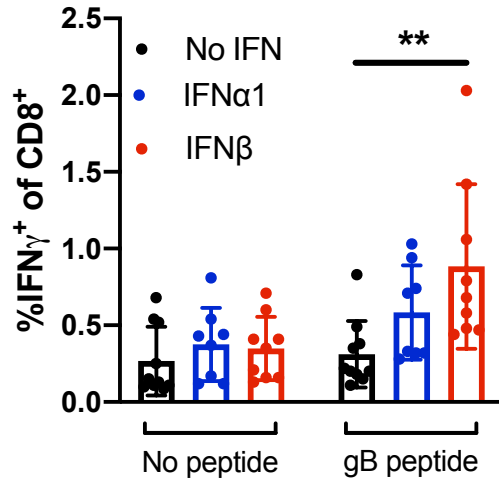

**Supplementary Figure 2. Increase in tumor-specific CD8 $^+$  T cells mediated by IFN $\beta$  is present at 60 days post-vaccination.** C57BL/6 mice were harvested sixty days post-vaccination with  $2.5 \times 10^6$  irradiated B16.Kb $^{loss}$ .gB $\pm$ IFN cells (n = 8-9 per group) and IFN $\gamma$ -producing gB-specific CD8 $^+$  T cells were measured. Data is pooled from 2 independent repeats and analysed by two-way ANOVA, \*\*p < 0.01. Bars represent mean  $\pm$  SEM.

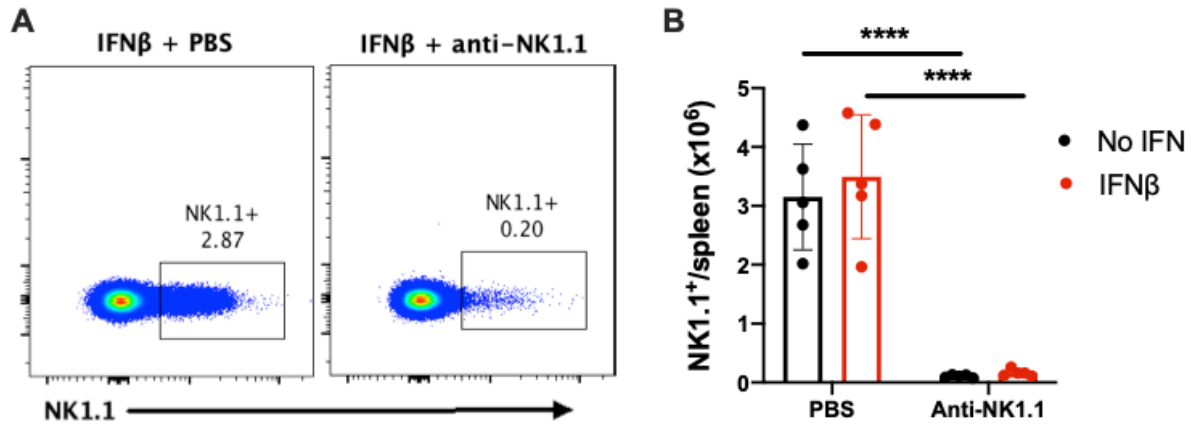

**Supplementary Figure 3. Anti-NK1.1 treatment results in successful depletion of NK cells. A,B** Representative flow plots of NK1.1 expression (A) and enumeration of NK1.1<sup>+</sup> cells (B) in the spleen of mice vaccinated seven days prior with  $2.5 \times 10^6$  irradiated B16.Kb<sup>loss</sup>.gB±IFNβ cells. Mice either received control PBS or 200 μg anti-NK1.1 one day prior and post vaccination (n = 5 per group). Asterisks indicate significant difference by two-way ANOVA, \*\*\*\*p < 0.001. Bars represent mean ± SEM.

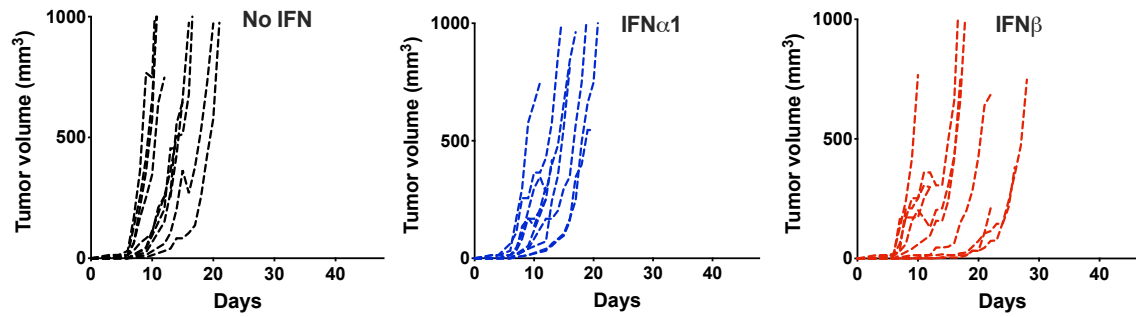

**Supplementary Figure 4. Vaccination with IFN $\beta$  delays tumor progression.** Individual tumor growth of individual C57BL/6 mice vaccinated with  $2.5 \times 10^6$  irradiated B16.Kb<sup>loss</sup>.gB $\pm$ IFN cells three days post-B16.gB tumor inoculation (n = 10 per group from two independent experiments).

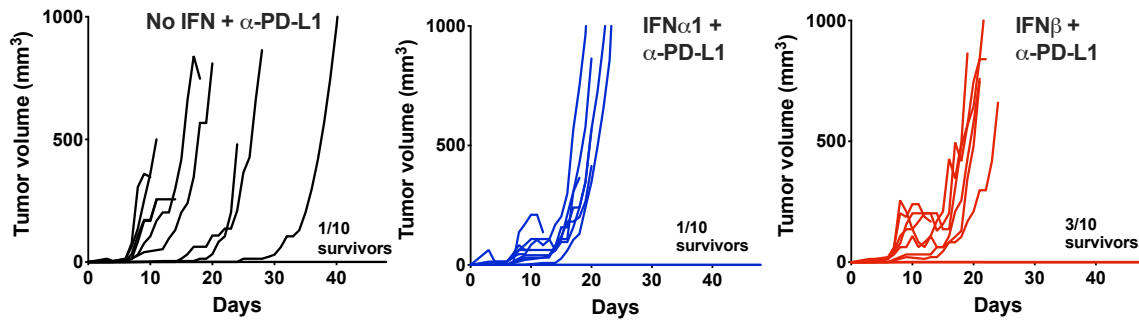

**Supplementary Figure 5.** Vaccination with IFN $\beta$  synergises with anti-PD-L1 checkpoint blockade therapy to increase overall survival. Individual tumor growth of C57BL/6 mice vaccinated with  $2.5 \times 10^6$  irradiated B16.Kb<sup>loss</sup>.gB $\pm$ IFN cells three days post-B16.gB tumor inoculation. Mice received  $\alpha$ -PD-L1 on days six, nine and twelve post-challenge (n = 10 per group from two independent experiments).

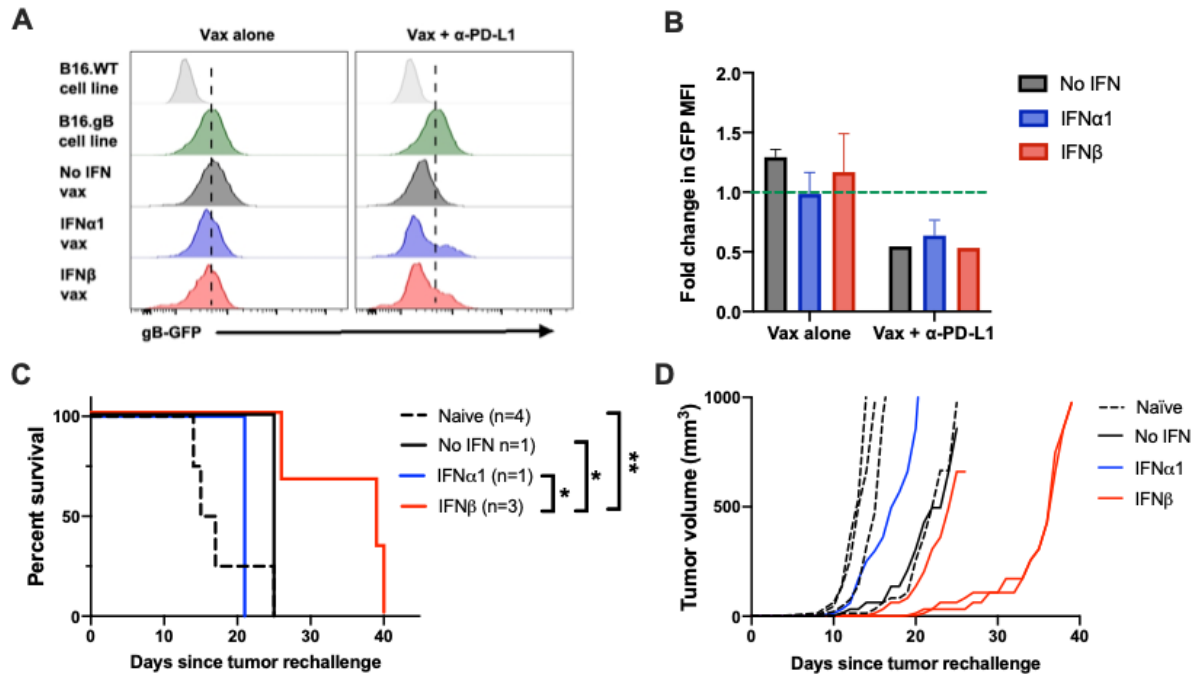

**Supplementary Figure 6. Anti-PDL1 may promote tumor antigen downregulation compared to vaccination alone, and increased epitope spreading when combined with vaccination plus IFN $\beta$ .** Mice were vaccinated with  $2.5 \times 10^6$  irradiated B16.Kb<sup>loss</sup>.gB $\pm$ IFN cells three days post-B16.gB tumor inoculation, with some mice receiving three doses of anti-PD-L1 on days six, nine and twelve post-challenge. **(A)** Representative histograms of gB-GFP expression and **(B)** fold decrease in GFP MFI of tumors harvested at endpoint ( $n = 1-4$  per group). **(C)** Survival and **(D)** individual growth curves of surviving mice rechallenged with B16 wildtype tumors sixty days post-initial tumor inoculation ( $n = 1-4$  per group). Significance was assessed by Log-rank Mantel-Cox test,  $**p < 0.05$ ,  $*p < 0.1$ . Bars represent mean  $\pm$  SEM.
